# Supplementary material for: Intrinsic apoptosis is evolutionarily divergent among metazoans
Source: PubMed Central journal article supplement — Evol Lett. 2023 Nov 16;8(2):267–82. doi: 10.1093/evlett/qrad057 (PMC10959488; doi:10.1093/evlett/qrad057), 2023-11-16
Supplement: qrad057_suppl_supplementary_tables_figures.pdf [file qrad057_suppl_supplementary_tables_figures.pdf]

1 **Title**

2 Intrinsic apoptosis is evolutionarily divergent among metazoans

3

4 **Authors**

5 Gabriel Krasovec <sup>1,2\*</sup>, Helen R Horkan <sup>3</sup>, Éric Quéinnec <sup>1\*\*</sup>, Jean-Philippe Chambon <sup>4\*\*</sup>

6

7 \* Authors for correspondence:

8 GK, [gabriel.krasovec@ijm.fr](mailto:gabriel.krasovec@ijm.fr)

9

10 \*\* These authors share senior authorship.

11

12 **Affiliations**

13 <sup>1</sup>ISYEB, Institut de Systématique, Evolution et Biodiversité, Sorbonne Université, CNRS, MNHN,  
14 F-75252 Paris Cedex 05, France.

15 <sup>2</sup>Present address : Université Paris Cité, CNRS, Institut Jacques Monod, F-75013 Paris, France.

16 <sup>3</sup>Centre for Chromosome Biology, School of Biological and Chemical Sciences, University of  
17 Galway, Galway H91W2TY, Ireland

18 <sup>4</sup>CRBM, Université de Montpellier, CNRS, 34000 Montpellier, France

19

20

21

22 **Supplementary Figure 1:**

23 Topology of metazoan CARD-caspase phylogeny obtained by Bayesian inference. Selected out  
24 group is the unique CARD-caspase of Ctenophora *Pleurobrachia bachei*. The four strongly  
25 supported monophyletic groups identified, caspase-9, caspase-2, inflammatory caspases, and  
26 caspase-Y, are the same as when the unique CARD-caspase of the Porifera *Amphimedon*  
27 *queenslandica* was used as out group. Also, sequences from bilaterian animals remain  
28 monophyletic.

29

30 **Supplementary Figure 2:**

31 Phylogeny of CARD-caspases at the deuterostomian scale. Maximum likelihood and Bayesian  
32 inference methods produce similar topologies. Despite the unstable position of  
33 cephalochordate *Branchiostoma belcheri* caspase-9A (green arrow), it unequivocally appears  
34 to belong to the caspase-9 group. Numbers given correspond to posterior probabilities. We  
35 used respectively as out groups *Capitella teleta* caspase-Y (ELT97848.1) (**A1**), *Aplysia*  
36 *californica* caspase-2 (XP\_005113266) (**A2**), *Hydra vulgaris* caspase-X2 (NP\_001274285.1) (**A3**),  
37 and *Caenorhabditis elegans* Ced3 (AAG42045.1) (**A4**).

38

39 **Supplementary Figure 3:**

40 Topology of metazoan CARD-caspase phylogeny obtained by Bayesian inference. Dataset used  
41 is similar to Figure 3 but with the absence of *Branchiostoma belcheri* caspase-9A. The four  
42 strongly supported monophyletic groups are identified, caspase-9, caspase-2, inflammatory  
43 caspases, and caspase-Y. Robustness of Caspase-2 clade increased by removing the long and  
44 divergent branch of *Branchiostoma belcheri* caspase-9A.

45

46 **Supplementary Figure 4:**

47 Topology of metazoan CARD-caspase phylogeny obtained by Bayesian inference. Dataset used  
 48 is similar to Figure 3 but with the absence of nematodes Ced-3. The four monophyletic groups  
 49 are identified, caspase-9, caspase-2, inflammatory caspases, and caspase-Y. Robustness of  
 50 Caspase-2 clade increased by removing the long and divergent branches of nematodes Ced-3.  
 51 Importantly, the robustness of the branching of insects Dronc with Caspase-2 is even  
 52 reinforced.

53

54 **Supplemental Table 1: List of CARD-caspases used for phylogenetic analysis.**

55

|                          | Species                         | Accession number         | Name           |
|--------------------------|---------------------------------|--------------------------|----------------|
| Porifera                 | <i>Amphimedon queenslandica</i> | XP_003383519.1           | Casp. Card a   |
|                          |                                 | XP_019854115.1           | Casp. Card b   |
|                          | <i>Geodia cydonium</i>          | CAC83013.1               | Casp. Card     |
| Cnidaria                 | <i>Acropora digitifera</i>      | XP_015766400.1           | Casp. X2       |
|                          |                                 | XP_015768208.1           | Casp. X1       |
|                          | <i>Exaiptasia pallida</i>       | KXJ12672.1               | Casp. X1       |
|                          |                                 | KXJ20965.1               | Casp. X2       |
|                          | <i>Hydra vulgaris</i>           | KXJ12683.1               | Casp. X3       |
|                          |                                 | ACY95435.1               | Casp. X1       |
|                          | ACY95436.1                      | Casp. X2                 |                |
| Ctenophora               | <i>Pleurobrachia bachei</i>     | Sb 2658116               | Casp. X        |
| Placozoa                 | <i>Trichoplax adherens</i>      | RDD44781.1               | Casp. X        |
| Lophotrocozoa            | <i>Aplysia californica</i>      | XP_005113266.2           | Casp. 2        |
|                          |                                 | XP_012945422.1           | Casp. Y        |
|                          | <i>Biomphalaria glabrata</i>    | XP_013082356.1           | Casp. 2        |
|                          |                                 | <i>Bulinus truncatus</i> | KAH9499437.1   |
|                          | KAH9513478.1                    |                          | Casp. Y2       |
|                          | <i>Capitella teleta</i>         | ELU00616.1               | Casp. 2        |
|                          |                                 | ELT97848.1               | Casp. Y        |
|                          | <i>Crassostrea angulata</i>     | AGN75137.1               | Casp. 2        |
|                          |                                 | <i>Crassostrea gigas</i> | XP_011419292.2 |
|                          | XP_011414267.3                  |                          | Casp. Y1       |
|                          | XP_011449817.2                  |                          | Casp. Y2       |
|                          |                                 | XP_011432762.2           | Casp. Y3       |
|                          | <i>Octopus bimaculoides</i>     | XP_014783442.1           | Casp. 2        |
|                          |                                 | XP_014790087.1           | Casp. Y1       |
|                          |                                 | XP_014784582.1           | Casp. Y2       |
| <i>Owenia fusiformis</i> | CAH1774650.1                    | Casp. Y1                 |                |
|                          | CAH1774000.1                    | Casp. Y2                 |                |

|                 |                                      |                                           |           |
|-----------------|--------------------------------------|-------------------------------------------|-----------|
| Chelicerata     | <i>Limulus polyphemus</i>            | XP_013788138.1                            | Casp. 2A  |
|                 |                                      | XP_013776997.1                            | Casp. 2B  |
| Insecta         | <i>Agrilus planipennis</i>           | XP_018324425.1                            | Casp. 2   |
|                 | <i>Apis mellifera</i>                | XP_016771440.1                            | Casp. 2   |
|                 | <i>Drosophila melanogaster</i>       | CAB53565.1                                | Casp. 2   |
|                 | <i>Habropoda laboriosa</i>           | XP_017788772.1                            | Casp. 2   |
|                 | <i>Helicoverpa armigera</i>          | AEK20835.1                                | Casp. 2   |
|                 | <i>Papilio machaon</i>               | XP_014362236.1                            | Casp. 2   |
|                 | <i>Tribolium castaneum</i>           | XP_001813274.1                            | Casp. 2   |
| Nematoda        | <i>Ascaris suum</i>                  | ERG86894.1                                | Casp. 2   |
|                 | <i>Caenorhabditis elegans</i>        | AAG42045.1                                | Casp. 2   |
| Vertebrata      | <i>Salmo salar</i>                   | XP_014009539.1                            | Casp. 2   |
|                 |                                      | XP_013991583.1                            | Casp. 9   |
|                 | <i>Mus musculus</i>                  | NP_033937.2                               | Casp. 1   |
|                 |                                      | EDL13489.1                                | Casp. 2   |
|                 |                                      | NP_031635.2                               | Casp. 4   |
|                 |                                      | AAH56447.1                                | Casp. 9   |
|                 |                                      | AAT91067.1                                | Casp. 12  |
|                 | <i>Xenopus laevis</i>                | NP_001081223.1                            | Casp. 1   |
|                 |                                      | NP_001081404.1                            | Casp. 2   |
|                 |                                      | NP_001079035.1                            | Casp. 9   |
|                 | <i>Gallus gallus</i>                 | XP_040543522.1                            | Casp. 1   |
|                 |                                      | NP_001161173.2                            | Casp. 2   |
|                 |                                      | XP_046759217.1                            | Casp. 9   |
|                 | <i>Homo sapiens</i>                  | NP_001214.1                               | Casp. 1   |
|                 |                                      | NP_116764.2                               | Casp. 2   |
|                 |                                      | KAI4078767.1                              | Casp. 9   |
| Echinodermata   | <i>Holothuria leucospilota</i>       | UTQ93743.1                                | Casp. 9   |
|                 | <i>Lytechinus variegatus</i>         | XP_041480663.1                            | Casp. 9   |
|                 | <i>Strongylocentrotus purpuratus</i> | XP_789183.3                               | Casp. 9A  |
|                 |                                      | XP_011661242.1 1                          | Casp. 9B  |
|                 |                                      | XP_011661359.1                            | Casp. 9C  |
| Hemichordata    | <i>Saccoglossus kowalevskii</i>      | XP_006811879.1                            | Casp. 9   |
| Cephalochordata | <i>Branchiostoma belcheri</i>        | XP_019646757.1                            | Casp. 2A  |
|                 |                                      | XP_019642903.1                            | Casp. 2B  |
|                 |                                      | XP_019623612.1                            | Casp. 9A  |
|                 |                                      | XP_019644208.1                            | Casp. 9B  |
|                 | <i>Branchiostoma floridae</i>        | EEN68002.1                                | Casp. 2   |
| Urochordata     | <i>Botryllus schlosseri</i>          | Boschl.CG.Botznik2013.chrUn.g02816.01.p   | Casp. 2A1 |
|                 |                                      | Boschl.CG.Botznik2013.chrUn.g08767.01.p   | Casp. 2A2 |
|                 |                                      | Boschl.CG.Botznik2013.chrUn.g09831.01.p   | Casp. 2B  |
|                 | <i>Ciona intestinalis</i>            | KH2012:KH.C4.463.v1.A.ND1-1               | Casp. 2A  |
|                 | <i>Ciona savignyi</i>                | CISAVI-CG-ENS81-R15-461426-463207-09349-P | Casp. 2A  |
|                 |                                      | CISAVI-CG-ENS81-R54-461275-467018-10343-P | Casp. 2B  |
|                 | <i>Molgula oculata</i>               | Moocul-CG-ELv1_2-S113854-g13164-01-p      | Casp. 2A  |
|                 |                                      | Moocul-CG-ELv1_2-S103067-g09526-01-p      | Casp. 2B  |
|                 | <i>Phallusia mammillata</i>          | PHMAMM-CG-MTP2014-S310-G07060-01-P        | Casp. 2A  |

|  |                            |                                    |          |
|--|----------------------------|------------------------------------|----------|
|  |                            | PHMAMM-CG-MTP2014-S92-G02989-01-P  | Casp. 2B |
|  | <i>Halocynthia roretzi</i> | HARORE-CG-MTP2014-S35-G03390-01-P  | Casp. 2A |
|  |                            | HARORE-CG-MTP2014-S130-G07320-01-P | Casp. 2B |

56  
57  
58  
59  
60  
61  
62

**Supplemental Table 2: List of Apaf-1 among metazoans. N/A: No Apaf-1 has been identified.**

|             | Species                          | Accession number | Name         |
|-------------|----------------------------------|------------------|--------------|
| Porifera    | <i>Amphimedon queenslandica</i>  | XP_019855714.1   | Apaf-1       |
| Ctenophora  | <i>Pleurobrachia bachei</i>      | N/A              |              |
| Placozoa    | <i>Trichoplax sp.</i>            | RDD40813.1       | Apaf-1       |
| Cnidaria    | <i>Acropora digitifera</i>       | XP_015776356.1   | Apaf-1       |
|             | <i>Acropora millepora</i>        | AJG37574.1       | Apaf-1-1     |
|             |                                  | XP_029185121.1   | Apaf-1-2     |
|             | <i>Actinia tenebrosa</i>         | XP_031572908.1   | Apaf-1       |
|             | <i>Dendronephthya gigantea</i>   | XP_028393942.1   | Apaf-1       |
|             | <i>Exaiptasia pallida</i>        | KXJ17575.1       | Apaf-1       |
|             | <i>Fimbriaphyllia ancora</i>     | QMS47765.1       | Apaf-1       |
|             | <i>Hydra vulgaris</i>            | CDG72123.1       | Apaf-1       |
|             | <i>Nematostella vectensis</i>    | XP_032220711.2   | Apaf-1       |
|             |                                  | XP_032223290.2   | Apaf-1 like1 |
|             | XP_001626725.1                   | Apaf-1 like2     |              |
|             | XP_032225984.2                   | Apaf-1 like3     |              |
|             | <i>Orbicella faveolata</i>       | XP_020620792.1   | Apaf-1       |
|             | <i>Paramuricea clavata</i>       | CAB4025087.1     | Apaf-1       |
|             | <i>Pocillopora damicornis</i>    | XP_027042245.1   | Apaf-1       |
|             | <i>Stylophora pistillata</i>     | XP_022790799.1   | Apaf-1       |
| Nematoda    | <i>Caenorhabditis elegans</i>    | CAA48781.1       | Ced-4        |
|             | <i>Caenorhabditis briggsae</i>   | XP_002642027.2   | Ced-4        |
| Insecta     | <i>Aedes aegypti</i>             | EAT48066.2       | Dark         |
|             | <i>Agrilus planipennis</i>       | XP_025834330.1   | Dark         |
|             | <i>Apis mellifera</i>            | XP_006565907.1   | Dark         |
|             | <i>Drosophila melanogaster</i>   | NP_725637.1      | Dark         |
|             | <i>Drosophila pseudoobscura</i>  | XP_001360832.3   | Dark         |
|             | <i>Habropoda laboriosa</i>       | XP_017794472.1   | Dark         |
|             | <i>Helicoverpa armigera</i>      | XP_021181657.1   | Dark         |
|             | <i>Papilio machaon</i>           | XP_014359375.1   | Dark         |
|             | <i>Tribolium castaneum</i>       | XP_015840766.1   | Dark         |
| Crustacea   | <i>Daphnia pulex</i>             | XP_046440096.1   | Apaf-1       |
| Chelicerata | <i>Centruroides sculpturatus</i> | XP_023242710.1   | Apaf-1       |
|             | <i>Dermacentor andersoni</i>     | XP_050040075.1   | Apaf-1       |
|             | <i>Dermacentor silvarum</i>      | XP_037568890.1   | Apaf-1       |
|             | <i>Limulus polyphemus</i>        | XP_022249946.1   | Apaf-1-1     |

|                 |                                      |                |              |
|-----------------|--------------------------------------|----------------|--------------|
|                 |                                      | XP_022244405.1 | Apaf-1-2     |
|                 | <i>Rhipicephalus microplus</i>       | XP_037276898.1 | Apaf-1       |
|                 | <i>Rhipicephalus sanguineus</i>      | XP_037506725.1 | Apaf-1       |
| Platyhelminthes | <i>Dibothriocephalus latus</i>       | VDN16554.1     | Apaf-1       |
|                 | <i>Echinococcus granulosus</i>       | XP_024354545.1 | Apaf-1       |
|                 | <i>Echinococcus_multilocularis</i>   | CDI98465.1     | Apaf-1       |
|                 | <i>Hydatigera taeniaeformis</i>      | VDM18691.1     | Apaf-1       |
|                 | <i>Macrostomum lignano</i>           | PAA53960.1     | Apaf-1-1     |
|                 |                                      | PAA76335.1     | Apaf-1-2     |
|                 | <i>Mesocestoides corti</i>           | VDD80977.1     | Apaf-1       |
|                 | <i>Schistosoma haematobium</i>       | XP_035588882.1 | Apaf-1       |
|                 | <i>Schistosoma japonicum</i>         | KAH8853391.1   | Apaf-1       |
|                 | <i>Spirometra erinacei</i>           | VZI41625.1     | Apaf-1       |
|                 | <i>Sparganum proliferum</i>          | VZI22297.1     | Apaf-1       |
| Lophotrocozoa   | <i>Aplysia californica</i>           | N/A            |              |
|                 | <i>Biomphalaria glabrata</i>         | N/A            |              |
|                 | <i>Crassostrea angulata</i>          | N/A            |              |
|                 | <i>Crassostrea gigas</i>             | N/A            |              |
|                 | <i>Octopus bimaculoides</i>          | N/A            |              |
|                 | <i>Capitella teleta</i>              | N/A            |              |
| Vertebrata      | <i>Homo sapiens</i>                  | XP_047284715.1 | Apaf-1       |
|                 | <i>Mus musculus</i>                  | NP_033814.2    | Apaf-1       |
|                 | <i>Canis lupus familiaris</i>        | XP_038544278.1 | Apaf-1       |
|                 | <i>Salmo salar</i>                   | XP_014063984.1 | Apaf-1       |
|                 | <i>Gallus gallus</i>                 | XP_040518239.1 | Apaf-1       |
|                 | <i>Xenopus laevis</i>                | NP_001085834.1 | Apaf-1       |
|                 | <i>Takifugu rubripes</i>             | XP_011611631.2 | Apaf-1       |
|                 | <i>Tetraodon nigroviridis</i>        | CAG01878.1     | Apaf-1       |
| Echinodermata   | <i>Acanthaster planci</i>            | XP_022083681.1 | Apaf-1       |
|                 | <i>Apostichopus japonicus</i>        | PIK57251.1     | Apaf-1       |
|                 | <i>Asterias rubens</i>               | XP_033645922.1 | Apaf-1       |
|                 | <i>Lytechinus variegatus</i>         | XP_041472197.1 | Apaf-1       |
|                 |                                      | XP_041469796.1 | Apaf-1 like1 |
|                 |                                      | XP_041459069.1 | Apaf-1 like2 |
|                 | <i>Patiria miniata</i>               | XP_038054179.1 | Apaf-1       |
|                 | <i>Patiria pectinifera</i>           | AUQ44343.1     | Apaf-1       |
|                 | <i>Strongylocentrotus purpuratus</i> | XP_030844937.1 | Apaf-1       |
|                 |                                      | XP_030854919.1 | Apaf-1 like1 |
|                 |                                      | XP_030828596.1 | Apaf-1 like2 |
| Hemichordata    | <i>Saccoglossus kowalevskii</i>      | XP_006818297.1 | Apaf-1       |
| Cephalochordata | <i>Branchiostoma belcheri</i>        | XP_019621685.1 | Apaf-1       |
|                 | <i>Branchiostoma floridae</i>        | XP_035681983.1 | Apaf-1       |
|                 |                                      | XP_035678916.1 | Apaf-1 like1 |
|                 |                                      | XP_035672288.1 | Apaf-1 like2 |
|                 |                                      | XP_035690210.1 | Apaf-1 like3 |
|                 |                                      | XP_035667061.1 | Apaf-1 like4 |
|                 |                                      | XP_035696241.1 | Apaf-1 like5 |

|             |                             |                |              |
|-------------|-----------------------------|----------------|--------------|
|             |                             | XP_035693308.1 | Apaf-1 like6 |
|             |                             | XP_035673101.1 | Apaf-1 like7 |
|             |                             | XP_035692718.1 | Apaf-1 like8 |
| Urochordata | <i>Botryllus schlosseri</i> | N/A            |              |
|             | <i>Ciona intestinalis</i>   | N/A            |              |
|             | <i>Ciona savignyi</i>       | N/A            |              |
|             | <i>Molgula oculata</i>      | N/A            |              |
|             | <i>Phallusia mammillata</i> | N/A            |              |
|             | <i>Halocynthia roretzi</i>  | N/A            |              |

63  
64  
65  
66

**Supplemental Table 3: List of Bcl-2 used for phylogenetic analysis.**

| Species       |                                 | Accession number | Names         |
|---------------|---------------------------------|------------------|---------------|
| Porifera      | <i>Amphimedon queenslandica</i> | XP_003383425.1   | Bcl-2 like 1  |
|               |                                 | XP_003387574.1   | Bcl-2 like 2  |
| Cnidaria      | <i>Hydra vulgaris</i>           | EF104645.1       | Bak 1         |
|               |                                 | EU035760.1       | Bak 2         |
|               |                                 | XP_012562061.1   | Bax           |
|               |                                 | EU035764.1       | Bcl-2 like 1  |
|               |                                 | EF104646.1       | Bcl-2 like 2  |
|               |                                 | EU035765.1       | Bcl-2 like 3  |
|               |                                 | EU035763.1       | Bcl-2 like 4  |
|               |                                 | EU035761.1       | Bok           |
|               |                                 | EF104647.1       | Mcl-1 1       |
|               |                                 | EU035762         | Mcl-1 2       |
| Nematoda      | <i>Caenorhabditis elegans</i>   | AAA20080.1       | Ced-9         |
| Insecta       | <i>Drosophila melanogaster</i>  | AAF44120.1       | Buffy (Bok-1) |
|               |                                 | AAF26289.1       | Debcl (Bok-2) |
| Lophotrocozoa | <i>Biomphalaria glabrata</i>    | XP_013085524.1   | Bax 1         |
|               |                                 | XP_013096338_1   | Bax 2         |
|               |                                 | XP_013086802.1   | Bax 3         |
|               |                                 | XP_013070177.1   | Bak           |
|               |                                 | XP_013081872.1   | Bcl-2 like 1  |
|               |                                 | XP_013093137.1   | Bcl-2 like 2  |
|               |                                 | XP_013068612.1   | Bcl-2 like 3  |
|               |                                 | XP_013083436.1   | Bcl-2 like 4  |
|               |                                 | XP_013069706.1   | Bok           |
|               |                                 | XP_013065969.1   | Mcl-1         |
|               | <i>Crassostrea gigas</i>        | XP_011424481.1   | Bax           |
|               |                                 | XP_011439700.1   | Bak           |
|               |                                 | XP_011449013.1   | Bcl-2 like 1  |
|               |                                 | ACH42081.1       | Bcl-2 like 2  |
|               |                                 | EKC18663.1       | Bcl-2 like 3  |
|               |                                 | XP_011436990.1   | Mcl-1 1       |
|               |                                 | EKC40007.1       | Mcl-1 2       |

|             |                           |                                      |        |
|-------------|---------------------------|--------------------------------------|--------|
| Vertebrata  | <i>Homo sapiens</i>       | AAA74466.1                           | Bak    |
|             |                           | NP_001278357.1                       | Bax    |
|             |                           | API71171.1                           | Bcl-2  |
|             |                           | AAK48715.1                           | Bcl-B  |
|             |                           | AAB09055.1                           | Bcl-w  |
|             |                           | CAA80661.1                           | Bcl-xL |
|             |                           | NP_004040.1                          | Bfl-1  |
|             |                           | NP_115904.1                          | Bok    |
|             |                           | AAF64255.1                           | Mcl-1  |
|             | <i>Mus musculus</i>       | NP_031549.2                          | Bak    |
|             |                           | NP_031553.1                          | Bax    |
|             |                           | AAH95964.1                           | Bcl-2  |
|             |                           | Q9Z0F3.1                             | Bcl-B  |
|             |                           | AAA51039.1                           | Bcl-xL |
|             |                           | AAB09056.1                           | Bcl-w  |
|             |                           | Q07440.1                             | Bfl-1  |
|             |                           | NP_058058.1                          | Bok    |
|             |                           | NP_032588.1                          | Mcl-1  |
|             | <i>Xenopus laevis</i>     | NP_001089587.1                       | Bak    |
|             |                           | AAR84081.1                           | Bax    |
|             |                           | BAH28834.1                           | Bcl-2  |
|             |                           | AAI10791.1                           | Bcl-xl |
|             |                           | XP_018089640.1                       | Bcl-w  |
|             |                           | NP_001139563.1                       | Bok    |
|             |                           | ACI47310.1                           | Mcl-1  |
| Urochordata | <i>Ciona intestinalis</i> | KH2012:KH.C4.794.v1.A.SL1-1          | Bax    |
|             |                           | KH2012:KH.S653.2.v2.A.SL1-1          | Bcl-xl |
|             |                           | KH2012:KH.L87.39.v1.A.ND1-1          | Bok    |
|             | <i>Molgula oculata</i>    | Moocul.CG.ELv1_2.S96550.g08147.01.p  | Bax    |
|             |                           | Moocul.CG.ELv1_2.S112899.g12639.01.p | Bok    |

67  
68

69

70 **Supplementary Table 4:** summary of species sampling across phylogenetic analyses. Species  
71 used for an analysis are denoted by an “x”. As the basis of our study, the CARD-caspase  
72 analysis determined the sampling strategy for other phylogenetic analyses. Species sampled  
73 in the Bcl-2 analysis and the broad analysis containing all types of caspases are also present in  
74 the sampling for the CARD-caspase only analysis. The sequences sampled for the Apaf-1  
75 analysis based on those used in previous works are highlighted by a “\*”. Other Apaf-1  
76 sequences were identified in this study. Apaf-1 sampling comprise all species used to conduct  
77 the CARD-caspases analysis. Among them, the ones not represented are species for which we  
78 did not detected an Apaf-1 candidate in the genome (N/A). Concerning the Apaf-1 analysis,  
79 we added several species including echinoderms and cnidarians to test the paraphyly of these  
80 two groups. We were not able to detect Apaf-1 in any of the currently available NCBI genome  
81 assemblies of molluscs, annelids, and urochordates. In order to prevent bias due to absence



82 of lophotrochozoan in the topology, we incorporated all Apaf-1 sequences that we detected  
 83 in platyhelminths by searching all currently available flatworm genome assemblies.  
 84

| Species                            | All caspases | CARD-caspases | Bcl-2 | Apaf-1 |
|------------------------------------|--------------|---------------|-------|--------|
| <i>Acanthaster planci</i>          |              |               |       | x      |
| <i>Acropora digitifera</i>         |              | x             |       | x      |
| <i>Acropora millepora</i>          |              |               |       | x      |
| <i>Actinia tenebrosa</i>           |              |               |       | x      |
| <i>Aedes aegypti</i>               |              |               |       | x*     |
| <i>Agrilus planipennis</i>         |              | x             |       | x      |
| <i>Amphimedon queenslandica</i>    | x            | x             | x     | x      |
| <i>Apis mellifera</i>              |              | x             |       | x      |
| <i>Aplysia californica</i>         |              | x             |       | N/A    |
| <i>Apostichopus japonicus</i>      |              |               |       | x      |
| <i>Ascaris suum</i>                | x            | x             |       | N/A    |
| <i>Asterias rubens</i>             |              |               |       | x      |
| <i>Biomphalaria glabrata</i>       |              | x             | x     | N/A    |
| <i>Botryllus schlosseri</i>        |              | x             |       | N/A    |
| <i>Branchiostoma belcheri</i>      |              | x             |       | x      |
| <i>Branchiostoma floridae</i>      |              | x             |       | x*     |
| <i>Bulinus truncatus</i>           |              | x             |       | N/A    |
| <i>Caenorhabditis briggsae</i>     |              |               |       | x*     |
| <i>Caenorhabditis elegans</i>      | x            | x             | x     | x*     |
| <i>Canis lupus familiaris</i>      |              |               |       | x*     |
| <i>Capitella teleta</i>            |              | x             |       | N/A    |
| <i>Centruroides sculpturatus</i>   |              |               |       | x      |
| <i>Ciona intestinalis</i>          |              | x             | x     | N/A    |
| <i>Ciona savignyi</i>              |              | x             |       | N/A    |
| <i>Crassostrea angulata</i>        |              | x             |       | N/A    |
| <i>Crassostrea gigas</i>           |              | x             | x     | N/A    |
| <i>Daphnia pulex</i>               |              |               |       | x      |
| <i>Dendronephthya gigantea</i>     |              |               |       | x      |
| <i>Dermacentor andersoni</i>       |              |               |       | x      |
| <i>Dermacentor silvarum</i>        |              |               |       | x      |
| <i>Dibothriocephalus latus</i>     |              |               |       | x      |
| <i>Drosophila melanogaster</i>     | x            | x             | x     | x*     |
| <i>Drosophila pseudoobscura</i>    |              |               |       | x*     |
| <i>Echinococcus granulosus</i>     |              |               |       | x      |
| <i>Echinococcus multilocularis</i> |              |               |       | x      |
| <i>Exaiptasia pallida</i>          |              | x             |       | x      |
| <i>Fimbriaphyllia ancora</i>       |              |               |       | x      |
| <i>Gallus gallus</i>               | x            | x             |       | x*     |
| <i>Geodia cydonium</i>             |              | x             |       | N/A    |
| <i>Habropoda laboriosa</i>         |              | x             |       | x      |

|                                      |   |   |   |     |
|--------------------------------------|---|---|---|-----|
| <i>Halocynthia roretzi</i>           |   | x |   | N/A |
| <i>Helicoverpa armigera</i>          | x | x |   | x   |
| <i>Holothuria leucospilota</i>       |   | x |   | N/A |
| <i>Homo sapiens</i>                  | x | x | x | x   |
| <i>Hydatigera taeniaeformis</i>      |   |   |   | x   |
| <i>Hydra vulgaris</i>                | x | x | x | x   |
| <i>Limulus polyphemus</i>            | x | x |   | x   |
| <i>Lytechinus variegatus</i>         |   | x |   | x   |
| <i>Macrostomum lignano</i>           |   |   |   | x   |
| <i>Mesocestoides corti</i>           |   |   |   | x   |
| <i>Molgula oculata</i>               |   | x | x | N/A |
| <i>Mus musculus</i>                  |   | x | x | x   |
| <i>Nematostella vectensis</i>        |   |   |   | x*  |
| <i>Octopus bimaculoides</i>          | x | x |   | N/A |
| <i>Orbicella faveolata</i>           |   |   |   | x   |
| <i>Owenia fusiformis</i>             |   | x |   | N/A |
| <i>Papilio machaon</i>               |   | x |   | x   |
| <i>Paramuricea clavata</i>           |   |   |   | x   |
| <i>Patiria miniata</i>               |   |   |   | x   |
| <i>Patiria pectinifera</i>           |   |   |   | x   |
| <i>Phallusia mammillata</i>          |   | x |   | N/A |
| <i>Pleurobrachia bachei</i>          |   | x |   | N/A |
| <i>Pocillopora damicornis</i>        |   |   |   | x   |
| <i>Rhipicephalus microplus</i>       |   |   |   | x   |
| <i>Rhipicephalus sanguineus</i>      |   |   |   | x   |
| <i>Saccoglossus kowalevskii</i>      | x | x |   | x   |
| <i>Salmo salar</i>                   |   | x |   | x   |
| <i>Schistosoma haematobium</i>       |   |   |   | x   |
| <i>Schistosoma japonicum</i>         |   |   |   | x   |
| <i>Sparganum proliferum</i>          |   |   |   | x   |
| <i>Spirometra erinaceieuropaei</i>   |   |   |   | x   |
| <i>Strongylocentrotus purpuratus</i> |   | x |   | x*  |
| <i>Stylophora pistillata</i>         |   |   |   | x   |
| <i>Takifugu rubripes</i>             |   |   |   | x*  |
| <i>Tetraodon nigroviridis</i>        |   |   |   | x*  |
| <i>Tribolium castaneum</i>           |   | x |   | x*  |
| <i>Trichoplax sp.</i>                |   | x |   | x   |
| <i>Xenopus laevis</i>                |   | x | x | x*  |
